# Supplementary material for: Systematic screening of glycosylation- and trafficking-associated gene knockouts in Saccharomyces cerevisiae identifies mutants with improved heterologous exocellulase activity and host secretion
Source: PubMed Central journal article supplement (PMC3766678; doi:10.1186/1472-6750-13-71), 2013-09-03
Supplement: 1472-6750-13-71-S1.pdf [file 1472-6750-13-71-S1.pdf]

**Additional file 1. Cell density and doubling time of knockout strains with PCX expression in SC-URA medium.**

| Strain                      | OD <sub>600</sub> after 24 hours incubation | doubling time (minutes) |
|-----------------------------|---------------------------------------------|-------------------------|
| 426GD(WT)                   | 7.11±0.56                                   | 105                     |
| CBH1(WT)                    | 6.14±0.47                                   | 111                     |
| PCX(WT)                     | 5.04±2.06                                   | 191                     |
| PCX( $\Delta$ M)            | 4.13±0.92                                   | 166                     |
| PCX( $\Delta$ V)            | 6.39±0.34                                   | 113                     |
| PCX( $\Delta$ P)            | 7.28±0.60                                   | 101                     |
| PCX( $\Delta$ P $\Delta$ V) | 5.49±0.59                                   | 176                     |
| PCX( $\Delta$ M $\Delta$ P) | 4.58±1.62                                   | 139                     |
| PCX( $\Delta$ M $\Delta$ V) | NA                                          | -                       |
