# Supplementary material for: Systematic screening of glycosylation- and trafficking-associated gene knockouts in Saccharomyces cerevisiae identifies mutants with improved heterologous exocellulase activity and host secretion
Source: PubMed Central journal article supplement (PMC3766678; doi:10.1186/1472-6750-13-71), 2013-09-03
Supplement: 1472-6750-13-71-S9.pdf [file 1472-6750-13-71-S9.pdf]

## Additional file 9. Primer sequences for site-directed mutagenesis.

| substitution             | name    | Sequence                                   |
|--------------------------|---------|--------------------------------------------|
| Asn <sup>208</sup> → Gln | N208Q-F | ACGTTGAGGGCTGGCAGGCCACCAGTGCCAACGCG        |
|                          | N208Q-R | CGCGTTGGCACTGGTGGCCTGCCAGCCCTCAACGT        |
| Asn <sup>208</sup> → Asp | N208D-F | ACGTTGAGGGCTGGGACGCCACCAGTGCCAACGCG        |
|                          | N208D-R | CGCGTTGGCACTGGTGGCGTCCCAGCCCTCAACGT        |
| Asn <sup>326</sup> → Gln | N326Q-F | CAGAATGGGAAGGTCATCCAGCAATCCTCCGTCAAGATCCCC |
|                          | N326Q-R | GGGGATCTTGACGGAGGATTGCTGGATGACCTTCCCATTCTG |
| Asn <sup>326</sup> → Asp | N326D-F | CAGAATGGGAAGGTCATCCAGGACTCCTCCGTCAAGATCCCC |
|                          | N326D-R | GGGGATCTTGACGGAGGAGTCCTGGATGACCTTCCCATTCTG |
| Asn <sup>442</sup> → Gln | N442Q-F | CATCAAGTTCGGCGACCTCCAGACCACGTACACCGGCACC   |
|                          | N442Q-R | GGTGCCGGTGTACGTGGTCTGGAGGTCGCCGAACTTGATG   |
| Asn <sup>442</sup> → Asp | N442D-F | CATCAAGTTCGGCGACCTCGACACCACGTACACCGGCACC   |
|                          | N442D-R | GGTGCCGGTGTACGTGGTGTGCGAGGTCGCCGAACTTGATG  |
